# Supplementary material for: MBD3 as a Potential Biomarker for Colon Cancer: Implications for Epithelial-Mesenchymal Transition (EMT) Pathways
Source: MDPI journal article supplement (doi:10.3390/cancers15123185), 2023-06-14
Supplement: s1 [file s1]

# Supplementary Materials: MBD3 as a Potential Biomarker for Colon Cancer: Implications for Epithelial-Mesenchymal Transition (EMT) Pathways

Yuntao Ding, Huizhi Wang, Junqiang Liu <sup>1</sup>, Han Jiang, Aihua Gong and Min Xu

A

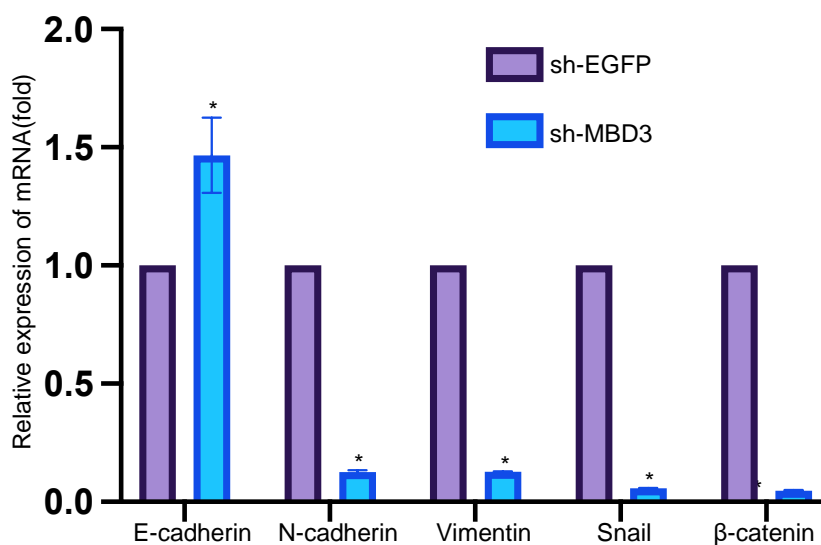

B

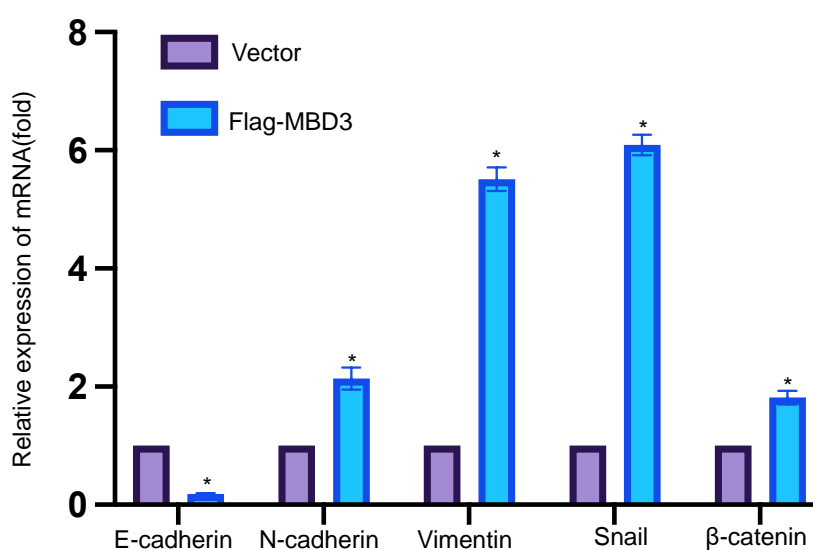

**Figure S1.** Differential expression of EMT-related molecules:(A) and (B):Differential expression of EMT-related molecules in SW620 cells of sh-MBD3 and CaCO2 cells of flag-MBD3.**Table S1.** Association of full tumor names with abbreviations.

| Cohort         | Full Name                                                        |
|----------------|------------------------------------------------------------------|
| TCGA-ACC       | Adrenocortical carcinoma                                         |
| TCGA-BLCA      | Bladder Urothelial Carcinoma                                     |
| TCGA-BRCA      | Breast invasive carcinoma                                        |
| TCGA-CESC      | Cervical squamous cell carcinoma and endocervical adenocarcinoma |
| TCGA-CHOL      | Cholangiocarcinoma                                               |
| TCGA-COAD      | Colon adenocarcinoma                                             |
| TCGA-COAD-READ | Colon adenocarcinoma/Rectum adenocarcinoma Esophageal carcinoma  |
| TCGA-DLBC      | Lymphoid Neoplasm Diffuse Large B-cell Lymphoma                  |
| TCGA-ESCA      | Esophageal carcinoma                                             |
| TCGA-FPPP      | FFPE Pilot Phase II                                              |
| TCGA-GBM       | Glioblastoma multiforme                                          |
| TCGA-GBMLGG    | Glioma                                                           |
| TCGA-HNSC      | Head and Neck squamous cell carcinoma                            |
| TCGA-KICH      | Kidney Chromophobe                                               |
| TCGA-KIPAN     | Pan-kidney cohort (KICH+KIRC+KIRP)                               |
| TCGA-KIRC      | Kidney renal clear cell carcinoma                                |
| TCGA-KIRP      | Kidney renal papillary cell carcinoma                            |
| TCGA-LAML      | Acute Myeloid Leukemia                                           |
| TCGA-LGG       | Brain Lower Grade Glioma                                         |
| TCGA-LIHC      | Liver hepatocellular carcinoma                                   |
| TCGA-LUAD      | Lung adenocarcinoma                                              |
| TCGA-LUSC      | Lung squamous cell carcinoma                                     |
| TCGA-MESO      | Mesothelioma                                                     |
| TCGA-OV        | Ovarian serous cystadenocarcinoma                                |
| TCGA-PAAD      | Pancreatic adenocarcinoma                                        |
| TCGA-PCPG      | Pheochromocytoma and Paraganglioma                               |
| TCGA-PRAD      | Prostate adenocarcinoma                                          |
| TCGA-READ      | Rectum adenocarcinoma                                            |
| TCGA-SARC      | Sarcoma                                                          |
| TCGA-STAD      | Stomach adenocarcinoma                                           |
| TCGA-SKCM      | Skin Cutaneous Melanoma                                          |
| TCGA-STES      | Stomach and Esophageal carcinoma                                 |
| TCGA-TGCT      | Testicular Germ Cell Tumors                                      |
| TCGA-THCA      | Thyroid carcinoma                                                |
| TCGA-THYM      | Thymoma                                                          |
| TCGA-UCEC      | Uterine Corpus Endometrial Carcinoma                             |
| TCGA-UCS       | Uterine Carcinosarcoma                                           |
| TCGA-UVM       | Uveal Melanoma                                                   |
| TARGET-OS      | Osteosarcoma                                                     |
| TARGET-ALL     | Acute Lymphoblastic Leukemia                                     |
| TARGET-NB      | Neuroblastoma                                                    |
| TARGET-WT      | High-Risk Wilms Tumor                                            |

**Table S2.** Primer Oligonucleotides.

| Name         | Primer Sequence (5'-3')       |
|--------------|-------------------------------|
| E-cadherin-F | 5'-ATTTTTCCTCGACACCCGAT-3'    |
| E-cadherin-R | 5'-TCCCAGGCGTAGACCAAGA-3'     |
| β-catenin-F  | 5'-AAAGCGGCTGTTAGTCACTGG-3'   |
| β-catenin-R  | 5'-CGAGTCATTGCATACTGTCCAT-3'. |
| Vimentin-F   | 5'-AGTCCACTGAGTACCGGAGAC-3'   |

---

|              |                               |
|--------------|-------------------------------|
| Vimentin-R   | 5'-CATTTCACGCATCTGGCGTTC-3'   |
| N-cadherin-F | 5'- TCAGGCGTCTGTAGAGGCTT-3'   |
| N-cadherin-R | 5'-ATGCACATCCTTCGATAAGACTG-3' |
| Snail-F      | 5'-TCGGAAGCCTAACTACAGCGA-3'   |
| Snail-R      | 5'-AGATGAGCATTGGCAGCGAG-3'    |

---
